# Supplementary material for: Interactions between a subset of substrate side chains and AAA+ motor pore loops determine grip during protein unfolding
Source: eLife journal article supplement (doi:10.7554/elife.46808), 2019-06-28
Supplement: supp [file elife-46808-supp-v1.zip]

Archive with 1 entries (1 files):
- elife_poa_e46808_Transparent_Reporting_File.pdf
